# Supplementary material for: Identification of Circulating lncRNAs Associated with Gallbladder Cancer Risk by Tissue-Based Preselection, Cis-eQTL Validation, and Analysis of Association with Genotype-Based Expression
Source: MDPI journal article supplement (doi:10.3390/cancers14030634), 2022-01-27
Supplement: s1 [file s1]

**Supplementary Materials: Identification of Circulating lncRNAs Associated with Gallbladder Cancer Risk by Tissue-Based Preselection, Cis-eQTL Validation, and Analysis of Association with Genotype-Based Expression**

**Figure S1.** 39 high-quality preselected lncRNA candidates using ML, ordered by relative importance.

**Figure S2.** Predicted log 2 expression for *C22orf34* in the lncRNA-GBC association dataset.

**Table S1.** 36 preselected lncRNA candidates using J–T tests

**Table S2.** Identified and validated cis-lncRNA-eQTLs for the three preselected candidates.

**Source code in R**

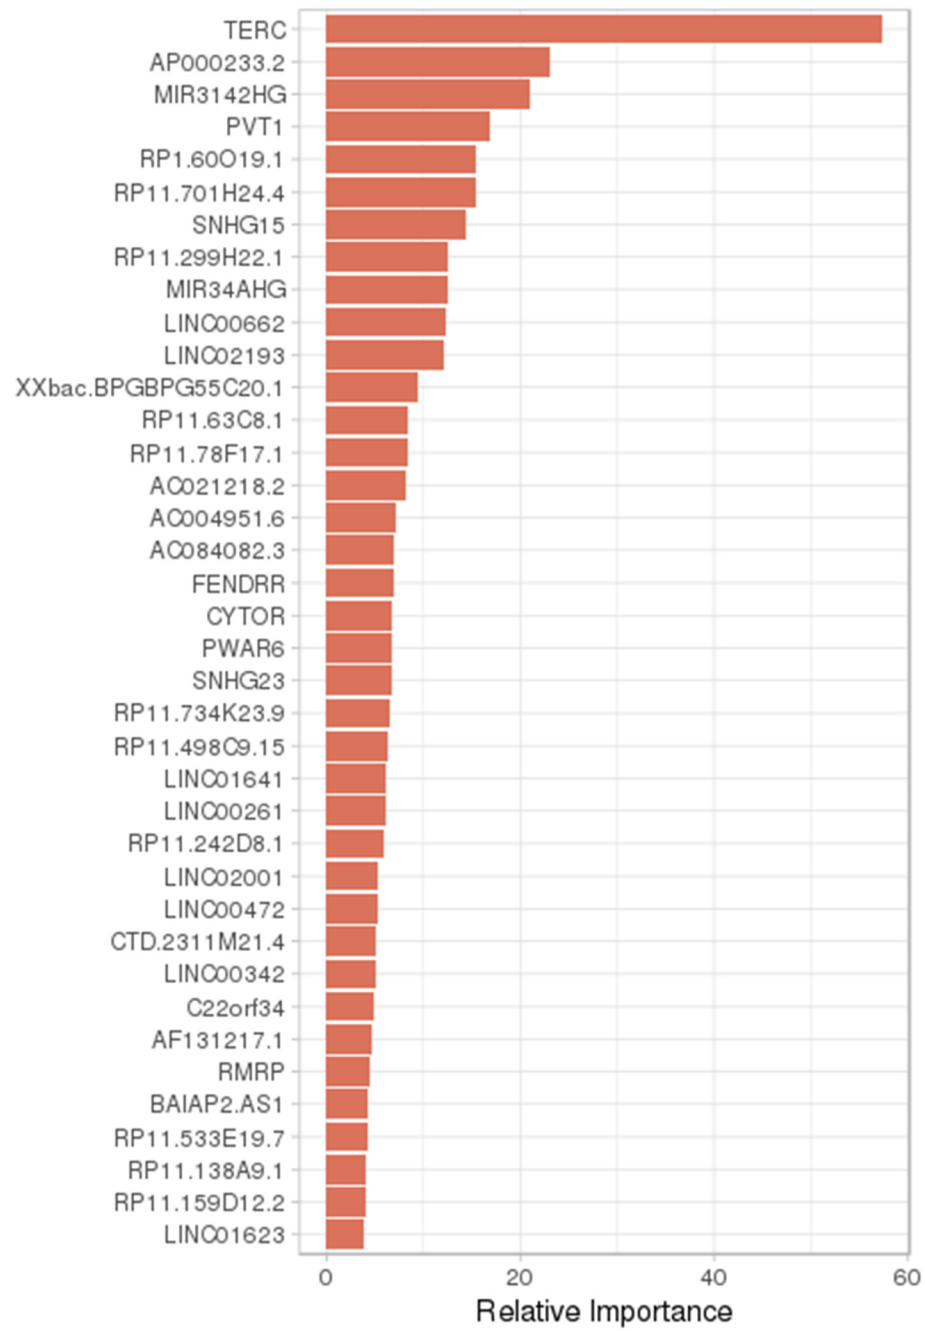

**Figure S1.** 39 high-quality preselected lncRNA candidates using ML, ordered by relative importance.

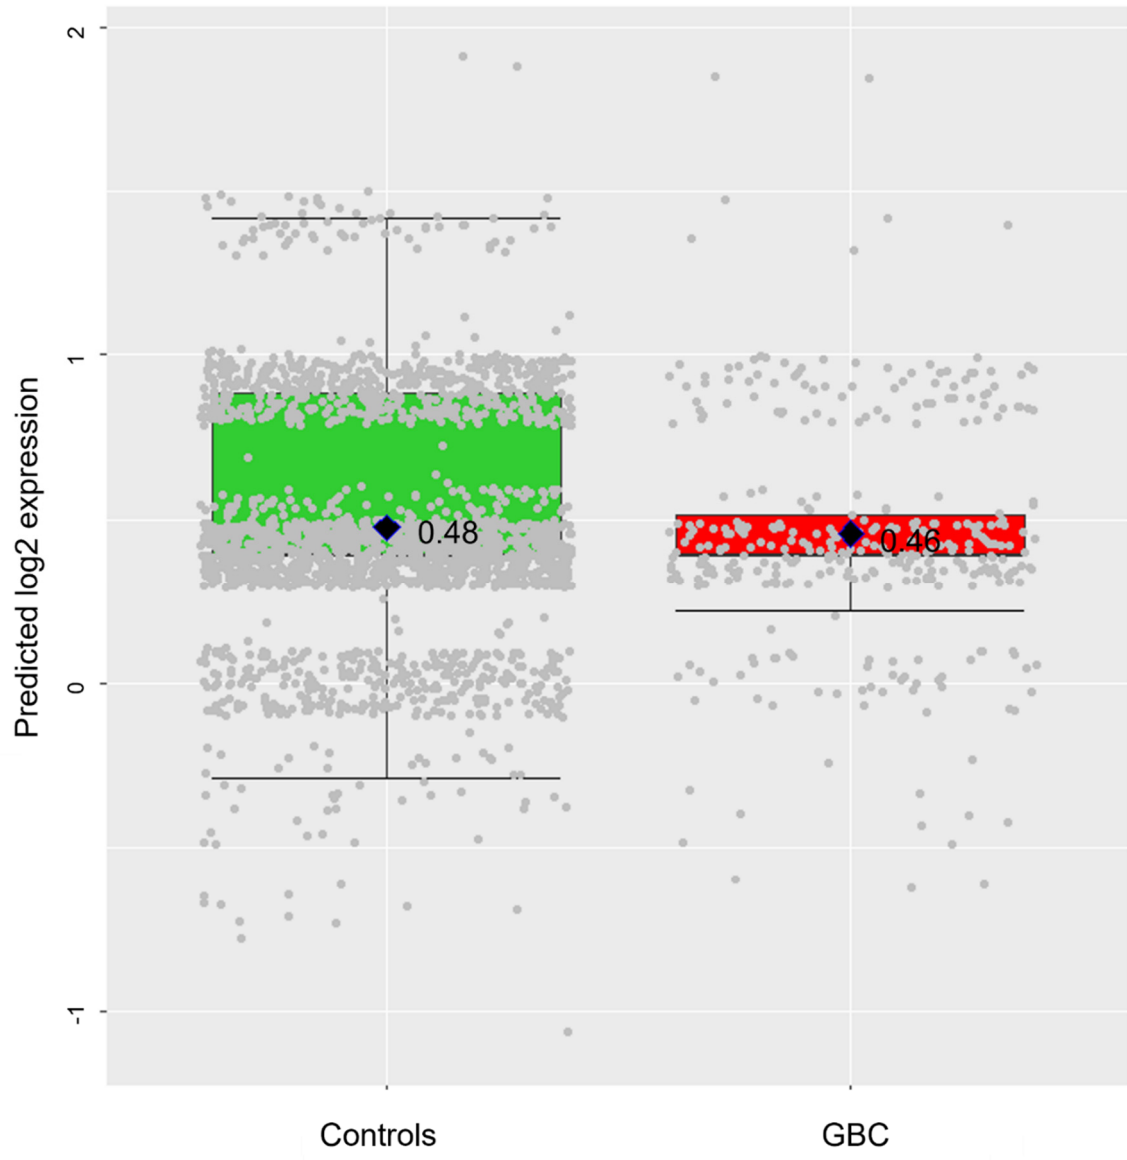

**Figure S2.** Predicted log<sub>2</sub> expression for *C22orf34* in the lncRNA-GBC association dataset.

**Table S1.** 36 preselected lncRNA candidates using J–T tests

| lncRNA           | adj. JT*<br>p-value | Log2 expression in<br>gallstone samples | OR <sup>†</sup> dysplasia | OR <sup>†</sup> GBC   |
|------------------|---------------------|-----------------------------------------|---------------------------|-----------------------|
|                  |                     | Median [5th to 95th]                    | Estimate [95%CI]          | Estimate [95%CI]      |
| AC084082.3       | 0.009               | 8.23 [ 1.45 - 9.93 ]                    | 2.10 [ 0.86 - 5.11 ]      | 1.39 [ 1.04 - 1.85 ]  |
| FAM95B1          | 0.009               | 1.44 [ 0.48 - 2.49 ]                    | 0.15 [ 0.03 - 0.78 ]      | 0.13 [ 0.03 - 0.64 ]  |
| HCG11            | 0.009               | 1.50 [ 0.65 - 2.78 ]                    | 3.01 [ 1.14 - 7.99 ]      | 2.99 [ 1.12 - 7.96 ]  |
| LINC00472        | 0.009               | 1.48 [ 0.63 - 2.53 ]                    | 0.89 [ 0.43 - 1.88 ]      | 0.11 [ 0.02 - 0.64 ]  |
| LINC00662        | 0.009               | 1.48 [ 0.55 - 4.38 ]                    | 2.73 [ 1.41 - 5.30 ]      | 2.00 [ 1.12 - 3.58 ]  |
| LINC00869        | 0.009               | 2.62 [ 0.92 - 3.97 ]                    | 2.41 [ 1.19 - 4.85 ]      | 3.35 [ 1.48 - 7.56 ]  |
| MIR155HG         | 0.009               | 7.66 [ 1.47 - 9.73 ]                    | 1.55 [ 1.03 - 2.31 ]      | 2.33 [ 1.29 - 4.18 ]  |
| MIR3142HG        | 0.009               | 10.56 [ 3.42 - 13.29 ]                  | 1.31 [ 0.94 - 1.84 ]      | 3.14 [ 1.30 - 7.59 ]  |
| PVT1             | 0.009               | 1.02 [ 0.45 - 1.75 ]                    | 0.43 [ 0.10 - 1.86 ]      | 4.36 [ 0.87 - 21.86 ] |
| PWAR6            | 0.009               | 1.65 [ 0.85 - 3.37 ]                    | 0.70 [ 0.33 - 1.47 ]      | 0.26 [ 0.08 - 0.80 ]  |
| RP1.60O19.1      | 0.009               | 3.02 [ 0.92 - 5.32 ]                    | 1.04 [ 0.67 - 1.64 ]      | 0.58 [ 0.34 - 1.00 ]  |
| RP11.701H24.4    | 0.009               | 11.03 [ 1.47 - 12.47 ]                  | 1.07 [ 0.87 - 1.32 ]      | 0.31 [ 0.11 - 0.84 ]  |
| RP4.561L24.3     | 0.009               | 6.76 [ 1.44 - 8.87 ]                    | 2.23 [ 1.24 - 4.03 ]      | 2.63 [ 1.30 - 5.34 ]  |
| TERC             | 0.009               | 1.50 [ 0.73 - 2.85 ]                    | 2.60 [ 1.17 - 5.78 ]      | 3.61 [ 1.53 - 8.55 ]  |
| LL0XNC01.237H1.2 | 0.02                | 1.02 [ 0.45 - 1.96 ]                    | 2.11 [ 0.90 - 4.93 ]      | 3.14 [ 1.13 - 8.73 ]  |
| RP11.78F17.1     | 0.02                | 1.20 [ 0.50 - 1.82 ]                    | 0.20 [ 0.04 - 0.98 ]      | 0.09 [ 0.02 - 0.52 ]  |
| FENDRR           | 0.02                | 1.49 [ 0.82 - 2.88 ]                    | 1.99 [ 0.75 - 5.26 ]      | 0.13 [ 0.02 - 0.71 ]  |
| LINC00261        | 0.02                | 2.07 [ 0.54 - 4.41 ]                    | 1.04 [ 0.64 - 1.67 ]      | 0.45 [ 0.22 - 0.90 ]  |
| LINC02001        | 0.03                | 4.30 [ 1.20 - 6.60 ]                    | 1.86 [ 1.21 - 2.86 ]      | 1.68 [ 1.12 - 2.50 ]  |
| RP11.498C9.15    | 0.03                | 0.98 [ 0.46 - 1.59 ]                    | 1.60 [ 0.58 - 4.45 ]      | 2.29 [ 0.73 - 7.15 ]  |
| RP11.170M17.1    | 0.03                | 1.44 [ 0.45 - 4.27 ]                    | 0.70 [ 0.38 - 1.29 ]      | 0.14 [ 0.02 - 0.77 ]  |
| SNHG9            | 0.03                | 2.55 [ 1.09 - 4.33 ]                    | 2.10 [ 1.07 - 4.13 ]      | 3.50 [ 1.43 - 8.60 ]  |
| MEG3             | 0.03                | 3.69 [ 1.44 - 6.23 ]                    | 0.95 [ 0.60 - 1.50 ]      | 0.39 [ 0.18 - 0.83 ]  |
| RP6.74O6.2       | 0.03                | 1.46 [ 0.50 - 2.79 ]                    | 0.77 [ 0.36 - 1.62 ]      | 0.51 [ 0.21 - 1.26 ]  |
| RP1.140K8.5      | 0.04                | 1.49 [ 0.59 - 3.05 ]                    | 1.02 [ 0.55 - 1.90 ]      | 0.34 [ 0.11 - 1.02 ]  |
| RP11.304L19.13   | 0.04                | 1.44 [ 0.52 - 3.16 ]                    | 1.43 [ 0.69 - 2.96 ]      | 2.77 [ 1.17 - 6.56 ]  |
| CTD.2311M21.4    | 0.04                | 1.42 [ 0.45 - 2.79 ]                    | 0.00 [ 0.00 - 0.15 ]      | 0.25 [ 0.06 - 1.02 ]  |
| CTD.2626G11.2    | 0.04                | 1.44 [ 0.50 - 2.20 ]                    | 0.17 [ 0.04 - 0.86 ]      | 0.42 [ 0.10 - 1.75 ]  |
| OLMALINC         | 0.04                | 1.48 [ 0.51 - 2.91 ]                    | 0.76 [ 0.35 - 1.64 ]      | 0.29 [ 0.09 - 0.95 ]  |
| C22orf34         | 0.04                | 1.44 [ 0.48 - 3.68 ]                    | 0.28 [ 0.08 - 1.07 ]      | 0.36 [ 0.10 - 1.28 ]  |
| LINC00511        | 0.04                | 1.20 [ 0.46 - 1.90 ]                    | 1.38 [ 0.4 - 4.75 ]       | 2.26 [ 0.76 - 6.77 ]  |
| LINC00977        | 0.04                | 1.27 [ 0.52 - 2.29 ]                    | 2.01 [ 0.75 - 5.38 ]      | 2.04 [ 0.81 - 5.13 ]  |
| CTD.2210P24.2    | 0.04                | 1.46 [ 0.61 - 4.85 ]                    | 0.85 [ 0.45 - 1.63 ]      | 2.52 [ 1.10 - 5.77 ]  |
| MIR34AHG         | 0.04                | 6.35 [ 1.44 - 9.78 ]                    | 1.60 [ 1.13 - 2.28 ]      | 2.02 [ 1.23 - 3.34 ]  |
| CYTOR            | 0.04                | 1.44 [ 0.48 - 2.18 ]                    | 0.85 [ 0.33 - 2.16 ]      | 2.27 [ 0.59 - 8.70 ]  |
| RP11.714M23.2    | 0.04                | 1.44 [ 0.51 - 2.26 ]                    | 0.91 [ 0.46 - 1.80 ]      | 0.36 [ 0.10 - 1.35 ]  |

\*FDR-adjusted p value from J–T test.

†ORs were estimated using robust logistic regression models.

**Table S2.** Identified and validated cis-lncRNA-eQTLs for the three preselected candidates.

| LINC00662    |                               |      |                  |                       |                      |                       |                      |
|--------------|-------------------------------|------|------------------|-----------------------|----------------------|-----------------------|----------------------|
| SNP ID       | Chromosomal location (GRCh38) | MAF  | Penetrance model | $\beta 1$ coefficient | $p$ -value $\beta 1$ | $\beta 2$ coefficient | $p$ -value $\beta 2$ |
| rs11083486   | chr19:28407449:G:T            | 0.31 | Additive         | -0.74                 | 0.01                 | -                     | -                    |
| rs11083486   | chr19:28407449:G:T            | 0.31 | Three-Genotypes  | -0.96                 | 0.03                 | -1.57                 | 0.01                 |
| rs11083486   | chr19:28407449:G:T            | 0.31 | Dominant         | -0.86                 | 0.03                 | -                     | -                    |
| rs11083486   | chr19:28407449:G:T            | 0.31 | Recessive        | 1.29                  | 0.03                 | -                     | -                    |
| rs142521755  | chr19:27284894:T:A            | 0.07 | Dominant         | 1.08                  | 0.04                 | -                     | -                    |
| C22orf34     |                               |      |                  |                       |                      |                       |                      |
| SNP ID       | Chromosomal location (GRCh38) | MAF  | Penetrance model | $\beta 1$ coefficient | $p$ -value $\beta 1$ | $\beta 2$ coefficient | $p$ -value $\beta 2$ |
| rs5770650    | chr22:49683714:A:C            | 0.13 | Additive         | 0.48                  | 0.01                 | -                     | -                    |
| rs9628049    | chr22:49551343:C:T            | 0.06 | Additive         | -0.60                 | 0.02                 | -                     | -                    |
| rs5770650    | chr22:49683714:A:C            | 0.13 | Dominant         | 0.52                  | 0.01                 | -                     | -                    |
| rs9628049    | chr22:49551343:C:T            | 0.06 | Dominant         | -0.60                 | 0.02                 | -                     | -                    |
| rs80641      | chr22:49548950:G:T            | 0.11 | Three-Genotypes  | -2.19                 | 0.006                | -1.99                 | 0.01                 |
| rs135786     | chr22:49550809:G:A            | 0.12 | Three-Genotypes  | -2.25                 | 0.004                | -1.98                 | 0.009                |
| rs135787     | chr22:49550871:G:A            | 0.12 | Three-Genotypes  | -2.25                 | 0.004                | -1.98                 | 0.009                |
| rs135788     | chr22:49551103:T:G            | 0.12 | Three-Genotypes  | -2.25                 | 0.004                | -1.98                 | 0.009                |
| rs135789     | chr22:49551309:T:C            | 0.12 | Three-Genotypes  | -2.25                 | 0.004                | -1.98                 | 0.009                |
| rs135791     | chr22:49552575:C:T            | 0.12 | Three-Genotypes  | -2.25                 | 0.004                | -1.98                 | 0.009                |
| rs135792     | chr22:49553166:G:C            | 0.12 | Three-Genotypes  | -2.25                 | 0.004                | -1.98                 | 0.009                |
| rs135793     | chr22:49553257:G:A            | 0.12 | Three-Genotypes  | -2.25                 | 0.004                | -1.98                 | 0.009                |
| rs135794     | chr22:49553508:T:C            | 0.12 | Three-Genotypes  | -2.25                 | 0.004                | -1.98                 | 0.009                |
| rs135796     | chr22:49554141:A:G            | 0.12 | Three-Genotypes  | -2.25                 | 0.004                | -1.98                 | 0.009                |
| rs135797     | chr22:49554220:G:C            | 0.12 | Three-Genotypes  | -2.25                 | 0.004                | -1.98                 | 0.009                |
| rs135798     | chr22:49554437:A:G            | 0.12 | Three-Genotypes  | -2.25                 | 0.004                | -1.98                 | 0.009                |
| rs135799     | chr22:49554674:G:A            | 0.12 | Three-Genotypes  | -2.25                 | 0.004                | -1.98                 | 0.009                |
| rs135800     | chr22:49555086:C:T            | 0.12 | Three-Genotypes  | -2.25                 | 0.004                | -1.98                 | 0.009                |
| rs135801     | chr22:49555128:G:A            | 0.12 | Three-Genotypes  | -2.25                 | 0.004                | -1.98                 | 0.009                |
| rs8140696    | chr22:49555464:A:G            | 0.12 | Three-Genotypes  | -2.25                 | 0.004                | -1.98                 | 0.009                |
| rs8140728    | chr22:49555542:A:G            | 0.12 | Three-Genotypes  | -2.25                 | 0.004                | -1.98                 | 0.009                |
| rs8140866    | chr22:49555658:A:C            | 0.12 | Three-Genotypes  | -2.25                 | 0.004                | -1.98                 | 0.009                |
| rs1054180151 | chr22:49555702:A:G            | 0.12 | Three-Genotypes  | -2.25                 | 0.004                | -1.98                 | 0.009                |
| rs135803     | chr22:49555956:T:C            | 0.12 | Three-Genotypes  | -2.25                 | 0.004                | -1.98                 | 0.009                |
| rs135804     | chr22:49556003:G:A            | 0.12 | Three-Genotypes  | -2.25                 | 0.004                | -1.98                 | 0.009                |
| rs135805     | chr22:49556247:T:C            | 0.12 | Three-Genotypes  | -2.25                 | 0.004                | -1.98                 | 0.009                |
| rs135806     | chr22:49556251:T:C            | 0.12 | Three-Genotypes  | -2.25                 | 0.004                | -1.98                 | 0.009                |
| rs135807     | chr22:49556406:A:G            | 0.12 | Three-Genotypes  | -2.25                 | 0.004                | -1.98                 | 0.009                |
| rs135810     | chr22:49557021:G:A            | 0.12 | Three-Genotypes  | -2.25                 | 0.004                | -1.98                 | 0.009                |
| rs135811     | chr22:49557199:A:G            | 0.12 | Three-Genotypes  | -2.25                 | 0.004                | -1.98                 | 0.009                |
| rs135812     | chr22:49557423:G:A            | 0.12 | Three-Genotypes  | -2.25                 | 0.004                | -1.98                 | 0.009                |
| rs135813     | chr22:49557486:A:G            | 0.12 | Three-Genotypes  | -2.25                 | 0.004                | -1.98                 | 0.009                |
| rs135814     | chr22:49557526:T:C            | 0.12 | Three-Genotypes  | -2.25                 | 0.004                | -1.98                 | 0.009                |
| rs9627745    | chr22:49557770:C:G            | 0.12 | Three-Genotypes  | -2.25                 | 0.004                | -1.98                 | 0.009                |

|              |                    |      |                 |       |       |       |       |
|--------------|--------------------|------|-----------------|-------|-------|-------|-------|
| rs35356406   | chr22:49558924:G:C | 0.12 | Three-Genotypes | -2.25 | 0.004 | -1.98 | 0.009 |
| rs135815     | chr22:49559001:T:C | 0.12 | Three-Genotypes | -2.25 | 0.004 | -1.98 | 0.009 |
| rs135816     | chr22:49559524:C:T | 0.12 | Three-Genotypes | -2.25 | 0.004 | -1.98 | 0.009 |
| rs135817     | chr22:49560766:G:A | 0.12 | Three-Genotypes | -2.25 | 0.004 | -1.98 | 0.009 |
| rs135821     | chr22:49562360:T:G | 0.12 | Three-Genotypes | -2.25 | 0.004 | -1.98 | 0.009 |
| rs13055340   | chr22:49562667:T:C | 0.12 | Three-Genotypes | -2.25 | 0.004 | -1.98 | 0.009 |
| rs1661563636 | chr22:49562872:C:T | 0.12 | Three-Genotypes | -2.25 | 0.004 | -1.98 | 0.009 |
| rs112515352  | chr22:49563159:G:A | 0.12 | Three-Genotypes | -2.25 | 0.004 | -1.98 | 0.009 |
| rs135822     | chr22:49563851:T:C | 0.12 | Three-Genotypes | -2.25 | 0.004 | -1.98 | 0.009 |
| rs135823     | chr22:49564023:G:A | 0.12 | Three-Genotypes | -2.25 | 0.004 | -1.98 | 0.009 |
| rs135826     | chr22:49565810:G:A | 0.11 | Three-Genotypes | -2.25 | 0.004 | -1.98 | 0.009 |
| rs6009823    | chr22:49692686:C:T | 0.12 | Three-Genotypes | 1.58  | 0.004 | 0.96  | 0.04  |
| rs6009824    | chr22:49692725:G:A | 0.12 | Three-Genotypes | 1.58  | 0.004 | 0.96  | 0.04  |

## Source code in R

```
#####
#
# program name:      01_LINC00662_preselection.R
# program title:     Preselection of differentially expressed lncRNAs
#                   along the sequence GS -> Dys -> GBC
#
# author:           Alice Blandino
# version:          1.0
# date:             15.11.2021
#
# description:       Calculation of two-sided Jonckheere-Terpstra test
#
# input files:       01_data_LINC00662_preselection.txt
#
# Available at       www.biometrie.uni-heidelberg.de/
#                   StatisticalGenetics/Software_and_Data
#
#####

# "01_data_LINC00662_preselection.txt"
#
# A text file with a header line, and then one line per study participant
# with the following two fields:
#
# LINC00662          expression of LINC00662 in FFPE tissue
# group              patients' status (gallstones,dysplasia,GBC)

# install and activate package to run two-sided J-T test
install.packages("DescTools", dependencies = TRUE)
library(DescTools)
# load data of study participants
setwd("**Path:**")
data_preselection <- read.table("01_data_LINC00662_preselection.txt", header=T)
# order the group variable
data_preselection$group <- factor(data_preselection$group,
                                levels=c("GBC", "dysplasia", "gallstones"),
                                ordered=TRUE)

# perform J-T test
jt.test<-JonckheereTerpstraTest(data_preselection$LINC00662,
                                data_preselection$group,
                                alternative = "two.sided",nperm = 5000)
```

```
#####
#
# program name:      02_LINC00662_validation.R
# program title:     Selection of best model for prediction
# author:            Alice Blandino
# version:           1.0
# date:              15.11.2021
#
# description:       Model selection based on robust AIC from robust
#                   linear regression models
# input files:       02_data_LINC00662_validation.txt
# Available at       www.biometrie.uni-heidelberg.de/
#                   StatisticalGenetics/Software_and_Data
#
#####

# "02_data_LINC00662_validation.txt"
#
# A text file with a header line, and then one line per study participant
# with the following two fields:
#
# LINC00662          LINC00662 expression in serum
# rs11083486         genotype for rs11083486 (0=G/G ;1=G/T ;2=T/T)
# rs142521755        genotype for rs142521755 (0=A/A ;1=A/T ;2=T/T)
# age                study participants' age
# gender              study participants' gender
# PC1-PC10           first 10 PCs

# install and activate package to add variables to dataframe
install.packages("dplyr", dependencies = TRUE)
library(dplyr)

setwd("**Path:\\**")
data_validation <- read.table("02_data_LINC00662_validation.txt", header=T)

# add new variables where:
# rs11083486 is once encoded dominantly (0+1 vs. 2), once encoded recessively (0 vs. 1+2)
# rs142521755 is encoded dominantly (0+1 vs. 2)
data_validation_new <- data_validation %>%
  mutate(rs11083486.dominant = ifelse(rs11083486 == "0", 1, rs11083486),
         rs11083486.recessive = ifelse(rs11083486 == "2", 1, rs11083486),
         rs142521755.dominant = ifelse(rs142521755 == "0", 1, rs142521755))

# model selection
# install and activate package to run robust linear regression models
install.packages(c("MASS", "clickR", "AICcmodavg"), dependencies = TRUE)
library(MASS)
library(clickR)
library(AICcmodavg)
# 1.
# MODELS WITH rs11083486 ONLY
# additive
model.rs11083486.additive <-
  rlm(LINC00662 ~ rs11083486 + age + gender + PC1 + PC2 + PC3 + PC4 + PC5 + PC6 + PC7 + PC8 + PC9 + PC10, data = data_validation_new)
# three-genotypes
model.rs11083486.three <-
  rlm(LINC00662 ~ as.factor(rs11083486) + age + gender + PC1 + PC2 + PC3 + PC4 + PC5 + PC6 + PC7 + PC8 + PC9 + PC10, data = data_validation_new)
# dominant
```



```

model.rs11083486.dom<-
rlm(LINC00662~rs11083486.dominant+age+gender+PC1+PC2+PC3+PC4+PC5+PC6+PC7+PC8+PC9+PC10,data=dat
a_validation_new)
# recessive
model.rs11083486.rec<-
rlm(LINC00662~rs11083486.recessive+age+gender+PC1+PC2+PC3+PC4+PC5+PC6+PC7+PC8+PC9+PC10,data=dat
a_validation_new)

# 2.
# MODEL WITH rs142521755 ONLY
# rs142521755 dominant
model.rs142521755.dom<-
rlm(LINC00662~rs142521755.dominant+age+gender+PC1+PC2+PC3+PC4+PC5+PC6+PC7+PC8+PC9+PC10,data=d
ata_validation_new)

# 3.
# MODELS WITH BOTH rs11083486 AND rs142521755
# rs11083486 additive & rs142521755 dominant
model.add.dom<-
rlm(LINC00662~rs11083486+rs142521755.dominant+age+gender+PC1+PC2+PC3+PC4+PC5+PC6+PC7+PC8+PC9+
PC10,data=data_validation_new)
# rs11083486 three-genotypes & rs142521755 dominant
model.three.dom<-
rlm(LINC00662~as.factor(rs11083486)+rs142521755.dominant+age+gender+PC1+PC2+PC3+PC4+PC5+PC6+PC7+P
C8+PC9+PC10,data=data_validation_new)
# rs11083486 dominant & rs142521755 dominant
model.dom.dom<-
rlm(LINC00662~rs11083486.dominant+rs142521755.dominant+age+gender+PC1+PC2+PC3+PC4+PC5+PC6+PC7+P
C8+PC9+PC10,data=data_validation_new)
# rs11083486 recessive & rs142521755 dominant
model.rec.dom<-
rlm(LINC00662~rs11083486.recessive+rs142521755.dominant+age+gender+PC1+PC2+PC3+PC4+PC5+PC6+PC7+P
C8+PC9+PC10,data=data_validation_new)

# create a dataframe with each model's name and its AIC
# vector with AICs:
AICs<-
c(AIC(model.rs11083486.additive),AIC(model.rs11083486.three),AIC(model.rs11083486.dom),AIC(model.rs1108348
6.rec),

AIC(model.rs142521755.dom),AIC(model.add.dom),AIC(model.three.dom),AIC(model.dom.dom),AIC(model.rec.dom
))
# vector with models' characteristics
models<-c("rs11083486.additive","rs11083486.three","rs11083486.dominant","rs11083486.recessive",
"rs142521755.dominant","additive+dominant","three+dominant","dominant+dominant","recessive+dominant")
# dataframe with both AIC and models' characteristics
summary.AIC<-data.frame(AICs,models)
# find which model has the lowest RAIC
summary.AIC[order(summary.AIC$AICs),,drop=FALSE] [1,]

```

```
#####
#
# program name:      03_LINC00662_prediction.R
# program title:     genotype-based lncRNA expression prediction
# author:            Alice Blandino
# version:           1.0
# date:              15.11.2021
#
# description:        prediction of lncRNA based on individual genotype data
#                    and quantification of GBC risk associated to it
# input files:        03_data_LINC00662_prediction.txt
# Available at        www.biometrie.uni-heidelberg.de/
#                    StatisticalGenetics/Software_and_Data
#
#####

# "03_data_LINC00662_prediction.txt"
#
# A text file with a header line, and then one line per study participant
# with the following two fields:
#
# rs11083486          genotype for rs11083486 (0=T/T ;1=G/T ;2=G/G)
# rs142521755         genotype for rs142521755 (0=A/A ;1=A/T ;2=T/T)
# pheno               patients' status (Control, Case)
# age                 study participants' age
# gender               study participants' gender
# PC1-PC10            first 10 PCs

# install and activate package to add variables to dataframe
install.packages(c("robustbase","dplyr"), dependencies = TRUE)
library(robustbase)
library(dplyr)

setwd("**Path:\\**")
data_prediction <- read.table("03_data_LINC00662_prediction.txt", header=T)

# calculate the SNP-based expression
data_prediction_calculation<-data_prediction%>%
  mutate(rs11083486.coeff=ifelse(rs11083486=="0",-0.7352*0,ifelse(rs11083486=="1",-0.7352*1,-0.7352*2)),
    rs142521755.coeff=ifelse(rs142521755=="0",1.0797*0,ifelse(rs142521755=="1",1.0797*0,1.0797)),
    predicted.LINC00662=0.9267+rs11083486.coeff+rs142521755.coeff)

# association analysis fitting robust logistic regression model

# set controls as baseline category
data_prediction_calculation$pheno<-ordered(data_prediction_calculation$pheno, levels = c("Control", "Case"))

# model fitting
mod<-
glmrob(as.factor(data_prediction_calculation$pheno)~predicted.LINC00662+age+gender+PC1+PC2+PC3+PC4+PC5+
PC6+PC7+PC8+PC9+PC10,family = binomial, method= "Mqle",control=
glmrobMqle.control(tcc=1.2),data=data_prediction_calculation)
summary(mod)

# extract Oddsratio for Cases
exp(summary(mod)$coefficients[2])

# extract lower and upper limits for confidence intervals
exp(summary(mod)$coefficients[2] + qnorm(c(0.5,0.025,0.975)) * summary(mod)$coefficients[2,2])[2]
exp(summary(mod)$coefficients[2] + qnorm(c(0.5,0.025,0.975)) * summary(mod)$coefficients[2,2])[3]
```

```
#####
#
# program name:      04_ML_models.R
# program title:     XGBoost algorithm
# author:           Sinan U. Umu
# version:          1.0
# date:             15.11.2021
#
# description:       Extreme gradient boosting (XGBoost) algorithm
#                   to train three-class classification ML models
#
#####

require(xgboost)
require(parallel)
require(doParallel)
require(tidyverse)
require(h2o)

setwd("Path:\")
lcrna_gbc=openxlsx::read.xlsx("lcrnAs_normalized_filtered.xlsx") %>% filter(!ID %in% excluded_samples)

h2o.init(nthreads = 15,max_mem_size = "200G")

function_h2o_data_split=function(lcrna_gbc,ratio=0.70,seed=1) { #seed=1

  dysplasia=h2o.splitFrame(as.h2o(lcrna_gbc %>% mutate(group=factor(group)) %>% filter(group == "dysplasia"))
,ratios = ratio,seed = seed)
  gallstones=h2o.splitFrame(as.h2o(lcrna_gbc %>% mutate(group=factor(group)) %>% filter(group == "gallstones"))
,ratios = ratio,seed = seed)

  GBC=h2o.splitFrame(as.h2o(lcrna_gbc %>% mutate(group=factor(group))%>% filter(group == "GBC")) ,ratios =
ratio,seed = seed)

  train_x=c(dysplasia[[1]],gallstones[[1]],GBC[[1]]) %>% purrr::map(~as_tibble(.)) %>% bind_rows()
  test_x=c(dysplasia[[2]],gallstones[[2]],GBC[[2]]) %>% purrr::map(~as_tibble(.)) %>% bind_rows()

  return(list(as.h2o(train_x),as.h2o(test_x)))
}

lcrna_split=function_h2o_data_split(lcrna_gbc,seed=1) #create the datasets training, validation

train_x=as.h2o(upSample(as.data.frame(lcrna_split[[1]]),as.data.frame(lcrna_split[[1]]) %>% pull(group))) #training
dataset
test_x=lcrna_split[[2]] #validation dataset

y=c("group")
x=setdiff(names(train_x), c(y,"Class","age","sex","ID")) #predictors, only lcrnAs left

hyper_params <- list(ntrees = seq(10, 300, 1),
  learn_rate = seq(0.005, 0.3, 0.01),
  max_depth = seq(1, 7, 1),
  sample_rate = seq(0.1, 1.0, 0.01),
  col_sample_rate = seq(0.2, 1.0, 0.01),
  reg_alpha=seq(0,0.3,0.025),
```

```

gamma=seq(3,7,1),
reg_lambda=seq(0,0.3,0.025)

)

search_criteria <- list(strategy = "RandomDiscrete",
                        max_models = 50
)

#grid search for hyperparameter tuning via crossvalidation
xgb_grid <- h2o.grid(algorithm = "xgboost",
                    grid_id = "xgboostgbc_grid_random_seed8",
                    x = x, y = y,
                    training_frame = train_x,
                    #validation_frame=test_x,
                    #reg_lambda=0,

                    auc_type = "WEIGHTED_OVR",

                    #validation_frame=test_x,
                    nfolds = 5,
                    seed = 8,
                    #stopping_metric="mean_per_class_error",
                    #stopping_tolerance=0.01,
                    #stopping_rounds=10,

                    hyper_params = hyper_params_hard_code,
                    search_criteria = search_criteria)

best_model <- h2o.getModel(xgb_grid@model_ids[[1]])

## extract best variables
as.tibble(h2o.varimp(best_model))      %>%      dplyr::mutate(median=median(relative_importance))      %>%
dplyr::mutate(f=ifelse(relative_importance >= median,"PASS","FAIL"))

##train the best using the hyperparameters on the training dataset

function_get_model_params=function(best_model,param_name) {

  best_model@allparameters[[param_name]]
}

#train the best using the hyperparameters
test_model <- h2o.xgboost(x = x,
                        y = y,
                        training_frame = train_x,

                        booster= function_get_model_params(best_model,"booster"),

                        normalize_type=function_get_model_params(best_model,"normalize_type"),
                        seed = 8,

                        ntrees = function_get_model_params(best_model,"ntrees"),
                        #nround=function_get_model_params(best_model,"nround"),
                        learn_rate = function_get_model_params(best_model,"learn_rate"),

```

```

eta=function_get_model_params(best_model,"eta"),
max_depth = function_get_model_params(best_model,"max_depth"),
sample_rate = function_get_model_params(best_model,"sample_rate"),
subsample = function_get_model_params(best_model,"subsample"),
col_sample_rate = function_get_model_params(best_model,"col_sample_rate"),
colsample_bylevel=function_get_model_params(best_model,"colsample_bylevel"),
reg_alpha=function_get_model_params(best_model,"reg_alpha"),
reg_lambda=function_get_model_params(best_model,"reg_lambda"),
colsample_bytree=function_get_model_params(best_model,"colsample_bytree"),
col_sample_rate_per_tree=function_get_model_params(best_model,"col_sample_rate_per_tree"),
colsample_bynode=function_get_model_params(best_model,"colsample_bynode"),
gamma=function_get_model_params(best_model,"gamma"),
min_split_improvement=function_get_model_params(best_model,"min_split_improvement"),
gainslift_bins=-1,
grow_policy="depthwise",
fold_assignment="Random",
tweedie_power=1.5,
max_leaves=0,
max_bins=function_get_model_params(best_model,"max_bins"),
min_rows=function_get_model_params(best_model,"min_rows"),
min_child_weight=function_get_model_params(best_model,"min_child_weight"),
#stopping_tolerance=0.01,
auc_type = "WEIGHTED_OVR",
nfolds=5
)

```

```

#get model performance on the test dataset (this is reported in the manuscript)
h2o.performance(test_model,test_x)

```

```

#these are the most important hyperparamaters, found via crossvalidation
hyper_params_found_by_the_best_model <- list(ntrees = 245,
      learn_rate = 0.115,
      max_depth = 6,
      sample_rate = 0.66,
      col_sample_rate = 0.47,
      reg_alpha=0,
      gamma=3,
      reg_lambda=0.3
)

```
